# Supplementary material for: Exchange of C-Terminal Variable Sequences within Morbillivirus Nucleocapsid Protein Are Tolerated: Development and Evaluation of Two Marker (DIVA) Vaccines (Sungri/96 DIVA, Nigeria/75/1 DIVA) against PPR
Source: MDPI journal article supplement (doi:10.3390/v13112320), 2021-11-21
Supplement: s1 [file s1]

Supplementary Materials

# Exchange of C-terminal variable sequences within morbilli-virus nucleocapsid protein are tolerated: Development and evaluation of a marker (DIVA) vaccine for PPR

**Table S1.** Primers designed for sequencing of DMV N-gene.

| Name of the Primer | Primer Details                           | Position of Primer |
|--------------------|------------------------------------------|--------------------|
| DMV NF             | GCG CGA TCC TAT CAA TTG GCA CAG G        | 65–85              |
| DMV PR             | CCG CTT GAC CGC CGT GAT CAT AAA<br>CAT G | 2132<-2157         |
| DMVNF1             | GAC AGG CGT CAT GAT CAG T                | 314-332            |
| DMVNF2             | CCG AGA CGA GGC GGT GGA TTA AA           | 679-701            |
| DMVNF3             | GCG AGA CTG CAC CGT ACA TGG TAA          | 1027-1050          |
| DMVNF4             | GCT GAG GCA TTA GCC AAG ATG AG           | 1577-1599          |
| DMVNR1             | CGG GCG GAT TTT CTC TGA G                | 1857<-1875         |
| DMVNR2             | GGT CGT CAG TGT TGT CGG ACT              | 1535<-1555         |
| DMVNR3             | CCA ACT CCC ATT GCA TAG CTC CA           | 1104<-1126         |
| DMVNR4             | CAC GGC GTT GCT GAG TAT ATT              | 700<-720           |
| DMVNR5             | GCC TCT GGA TGC AAA AGT GAG CCC T        | 443<-467           |

**Table S2.** Primers designed for overlapping PCR.

| Primer Name       | Primer Details                                   | Position of Primer |
|-------------------|--------------------------------------------------|--------------------|
| PPR-DMV F         | GGC TGG GGA CGA AAG AGC TAA TAG AGC AAT<br>AGG T | 1305-1338          |
| DMV-PPR R         | ACC TAT TGC TCT ATT AGC TCT TTC GTC CCC AGC<br>C | 1305<-1338         |
| DMV <i>Pac</i> IR | CGG CCT TAA TTA AAC GCT GCT CAG AGT GGA<br>TCC   | 1604<-1585         |
| PPR <i>Acl</i> IF | GCG CAA GAT CTA ACG TTA TGG CGA CTC TCC          | 93-120             |

**Table S3.** PPRV genome specific primers to RT-PCR.

| Primer Name | Primer Position | Primer Sequence                                      |
|-------------|-----------------|------------------------------------------------------|
| PPR-F-P6    | 2634-2653       | AGGAGTGCAAAGACGATCC<br>TTAGCGCTAAACACACTCC           |
| PPR-R-P8    | 3830-3850       | (reverse complementary-<br>GGAAGTGTGTTTAGCGCTAA<br>) |

**Table S4.** Primers designed for expression work.

| Primer Name  | Primer Details                           | Position of the Primer |
|--------------|------------------------------------------|------------------------|
| DMV-Bam-HIF1 | GCG GAT CCG CTA ATA GAG CAA TAG<br>GTC C | 1315-1340              |

---

|                         |                                          |           |
|-------------------------|------------------------------------------|-----------|
| <b>DMV-<br/>HindIII</b> | GCG CAA GCT TGC CAA GTA GAT CTT TAT<br>C | 1665-1690 |
|-------------------------|------------------------------------------|-----------|

---
